# Supplementary material
Source: Research Square preprint supplement (doi:10.21203/rs.3.rs-9382440/v1)

Supplemental Figure 2: XGBoost models for A) Endocrine dysfunction; B) MMSE <24; C) MRI changes at 6 months; D) Patient assessment; E) Physician assessment

A.


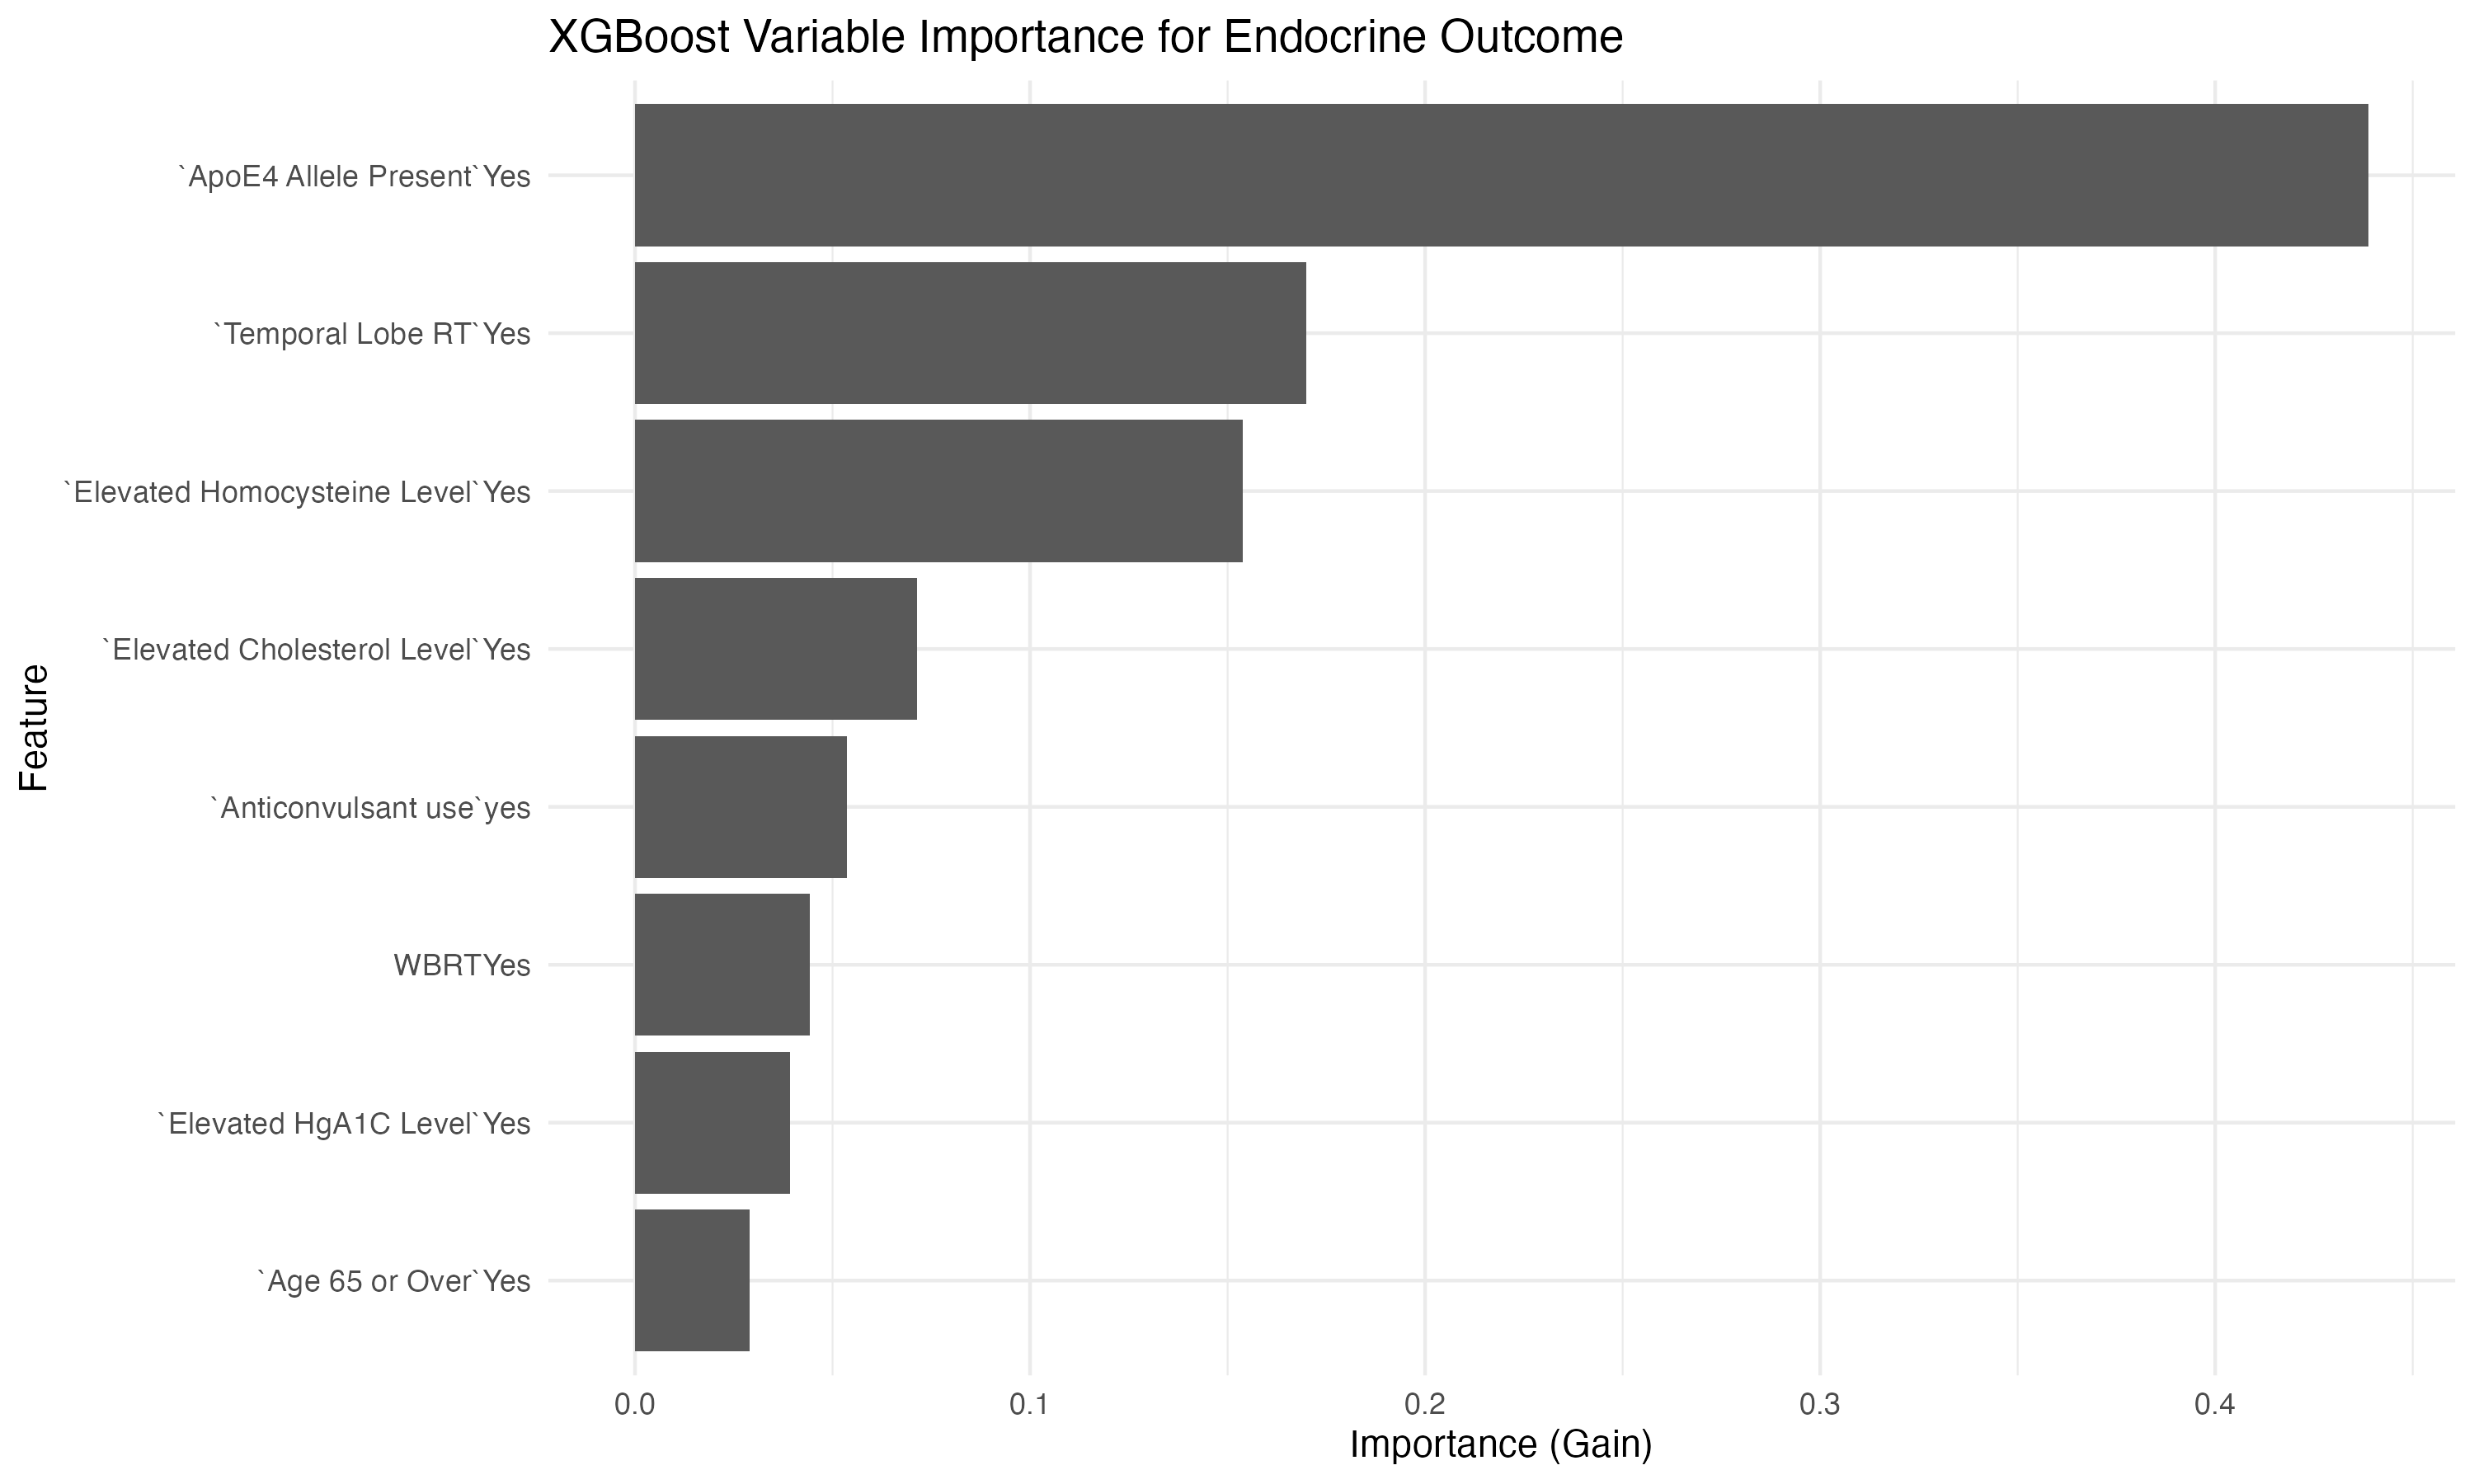


B.


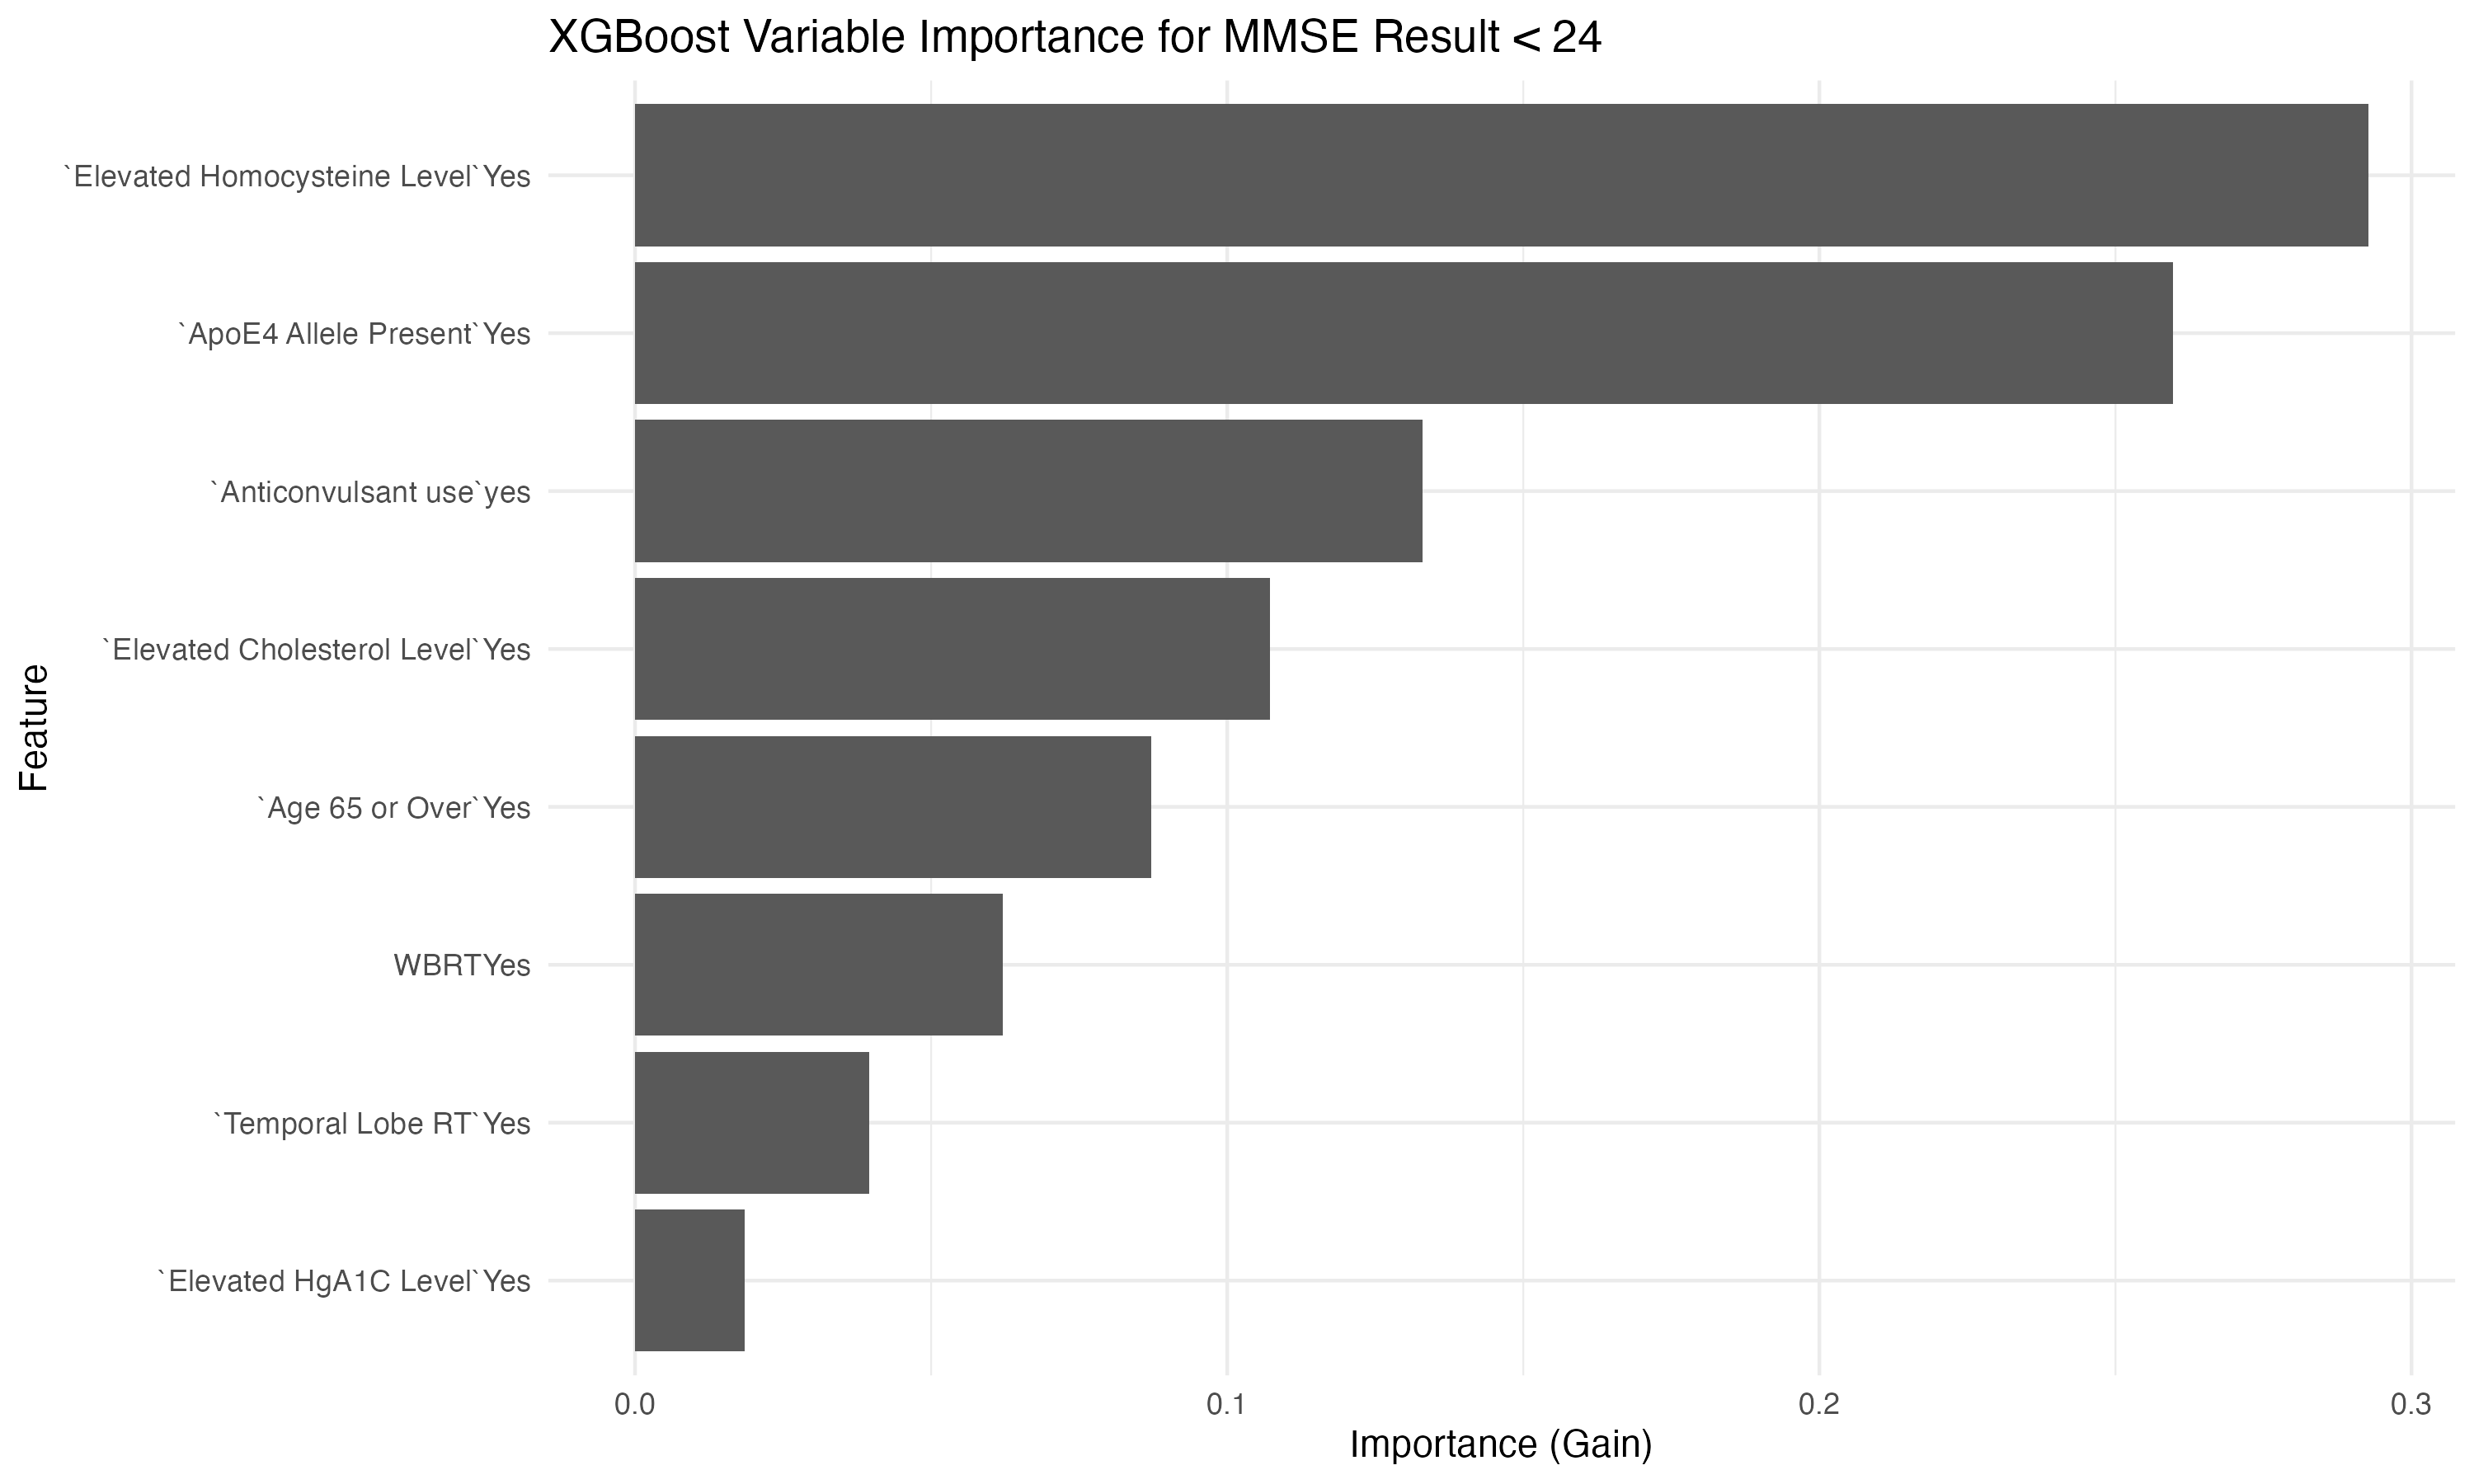


C.


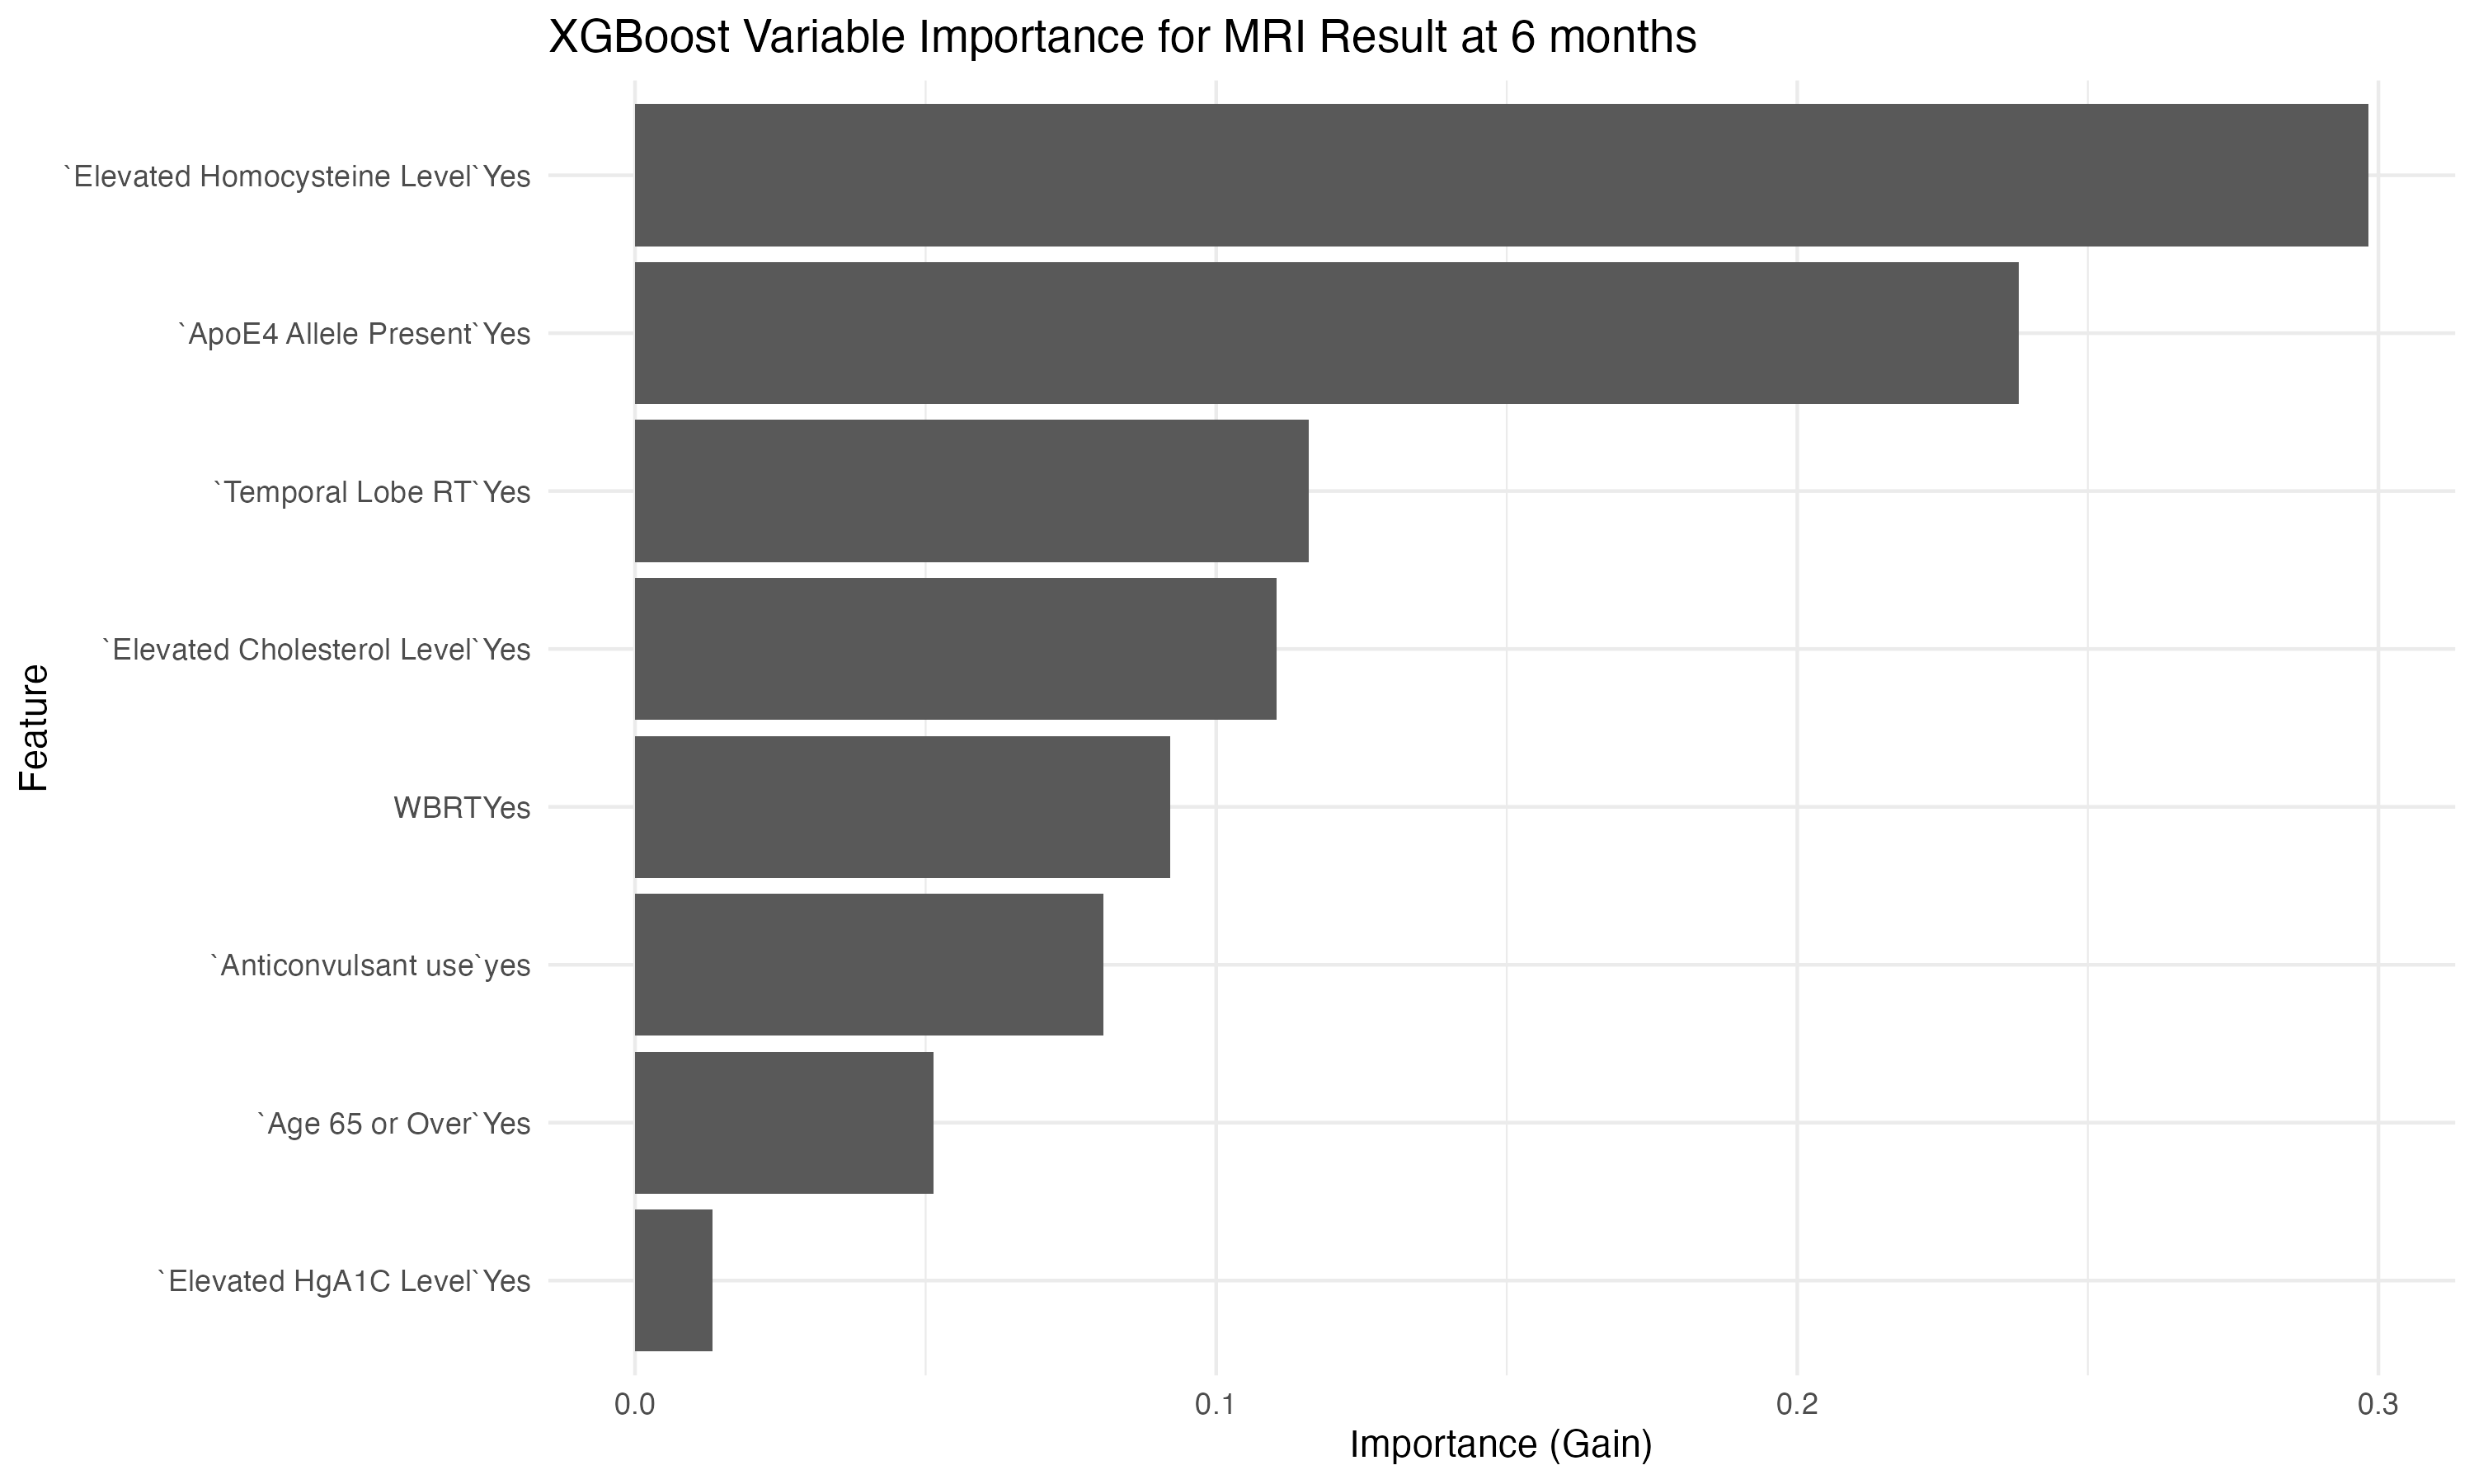


D.


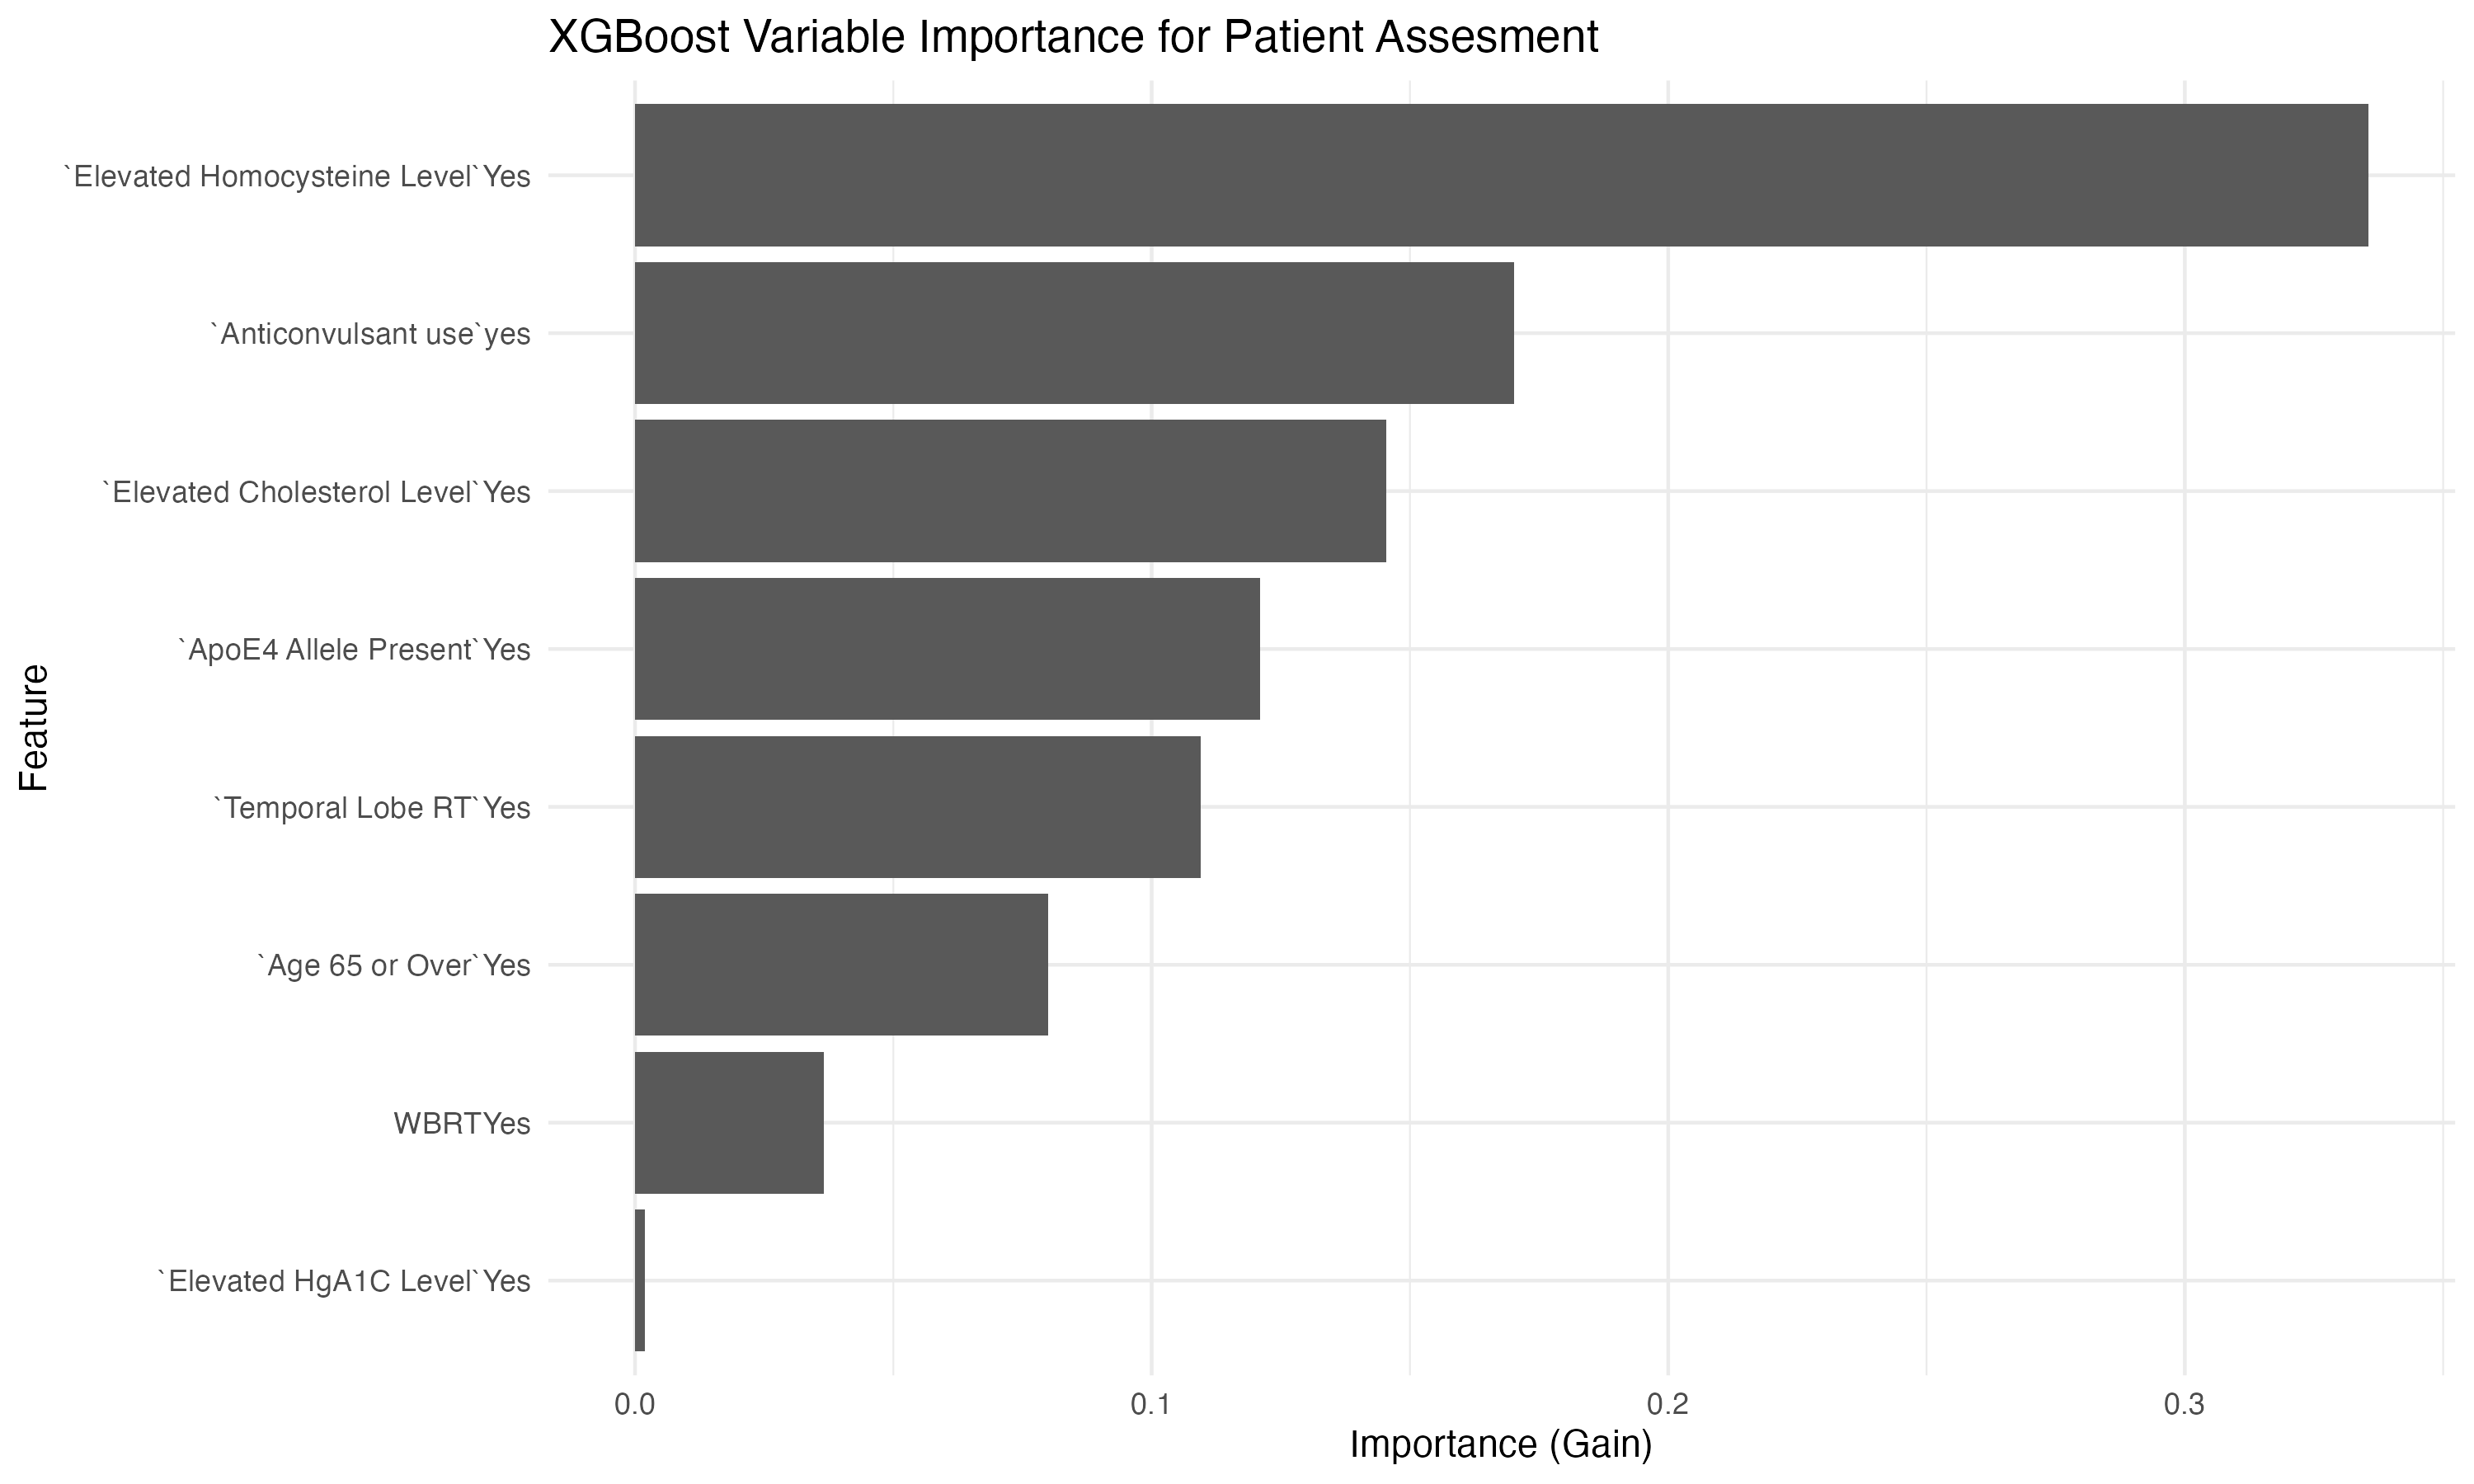


E.


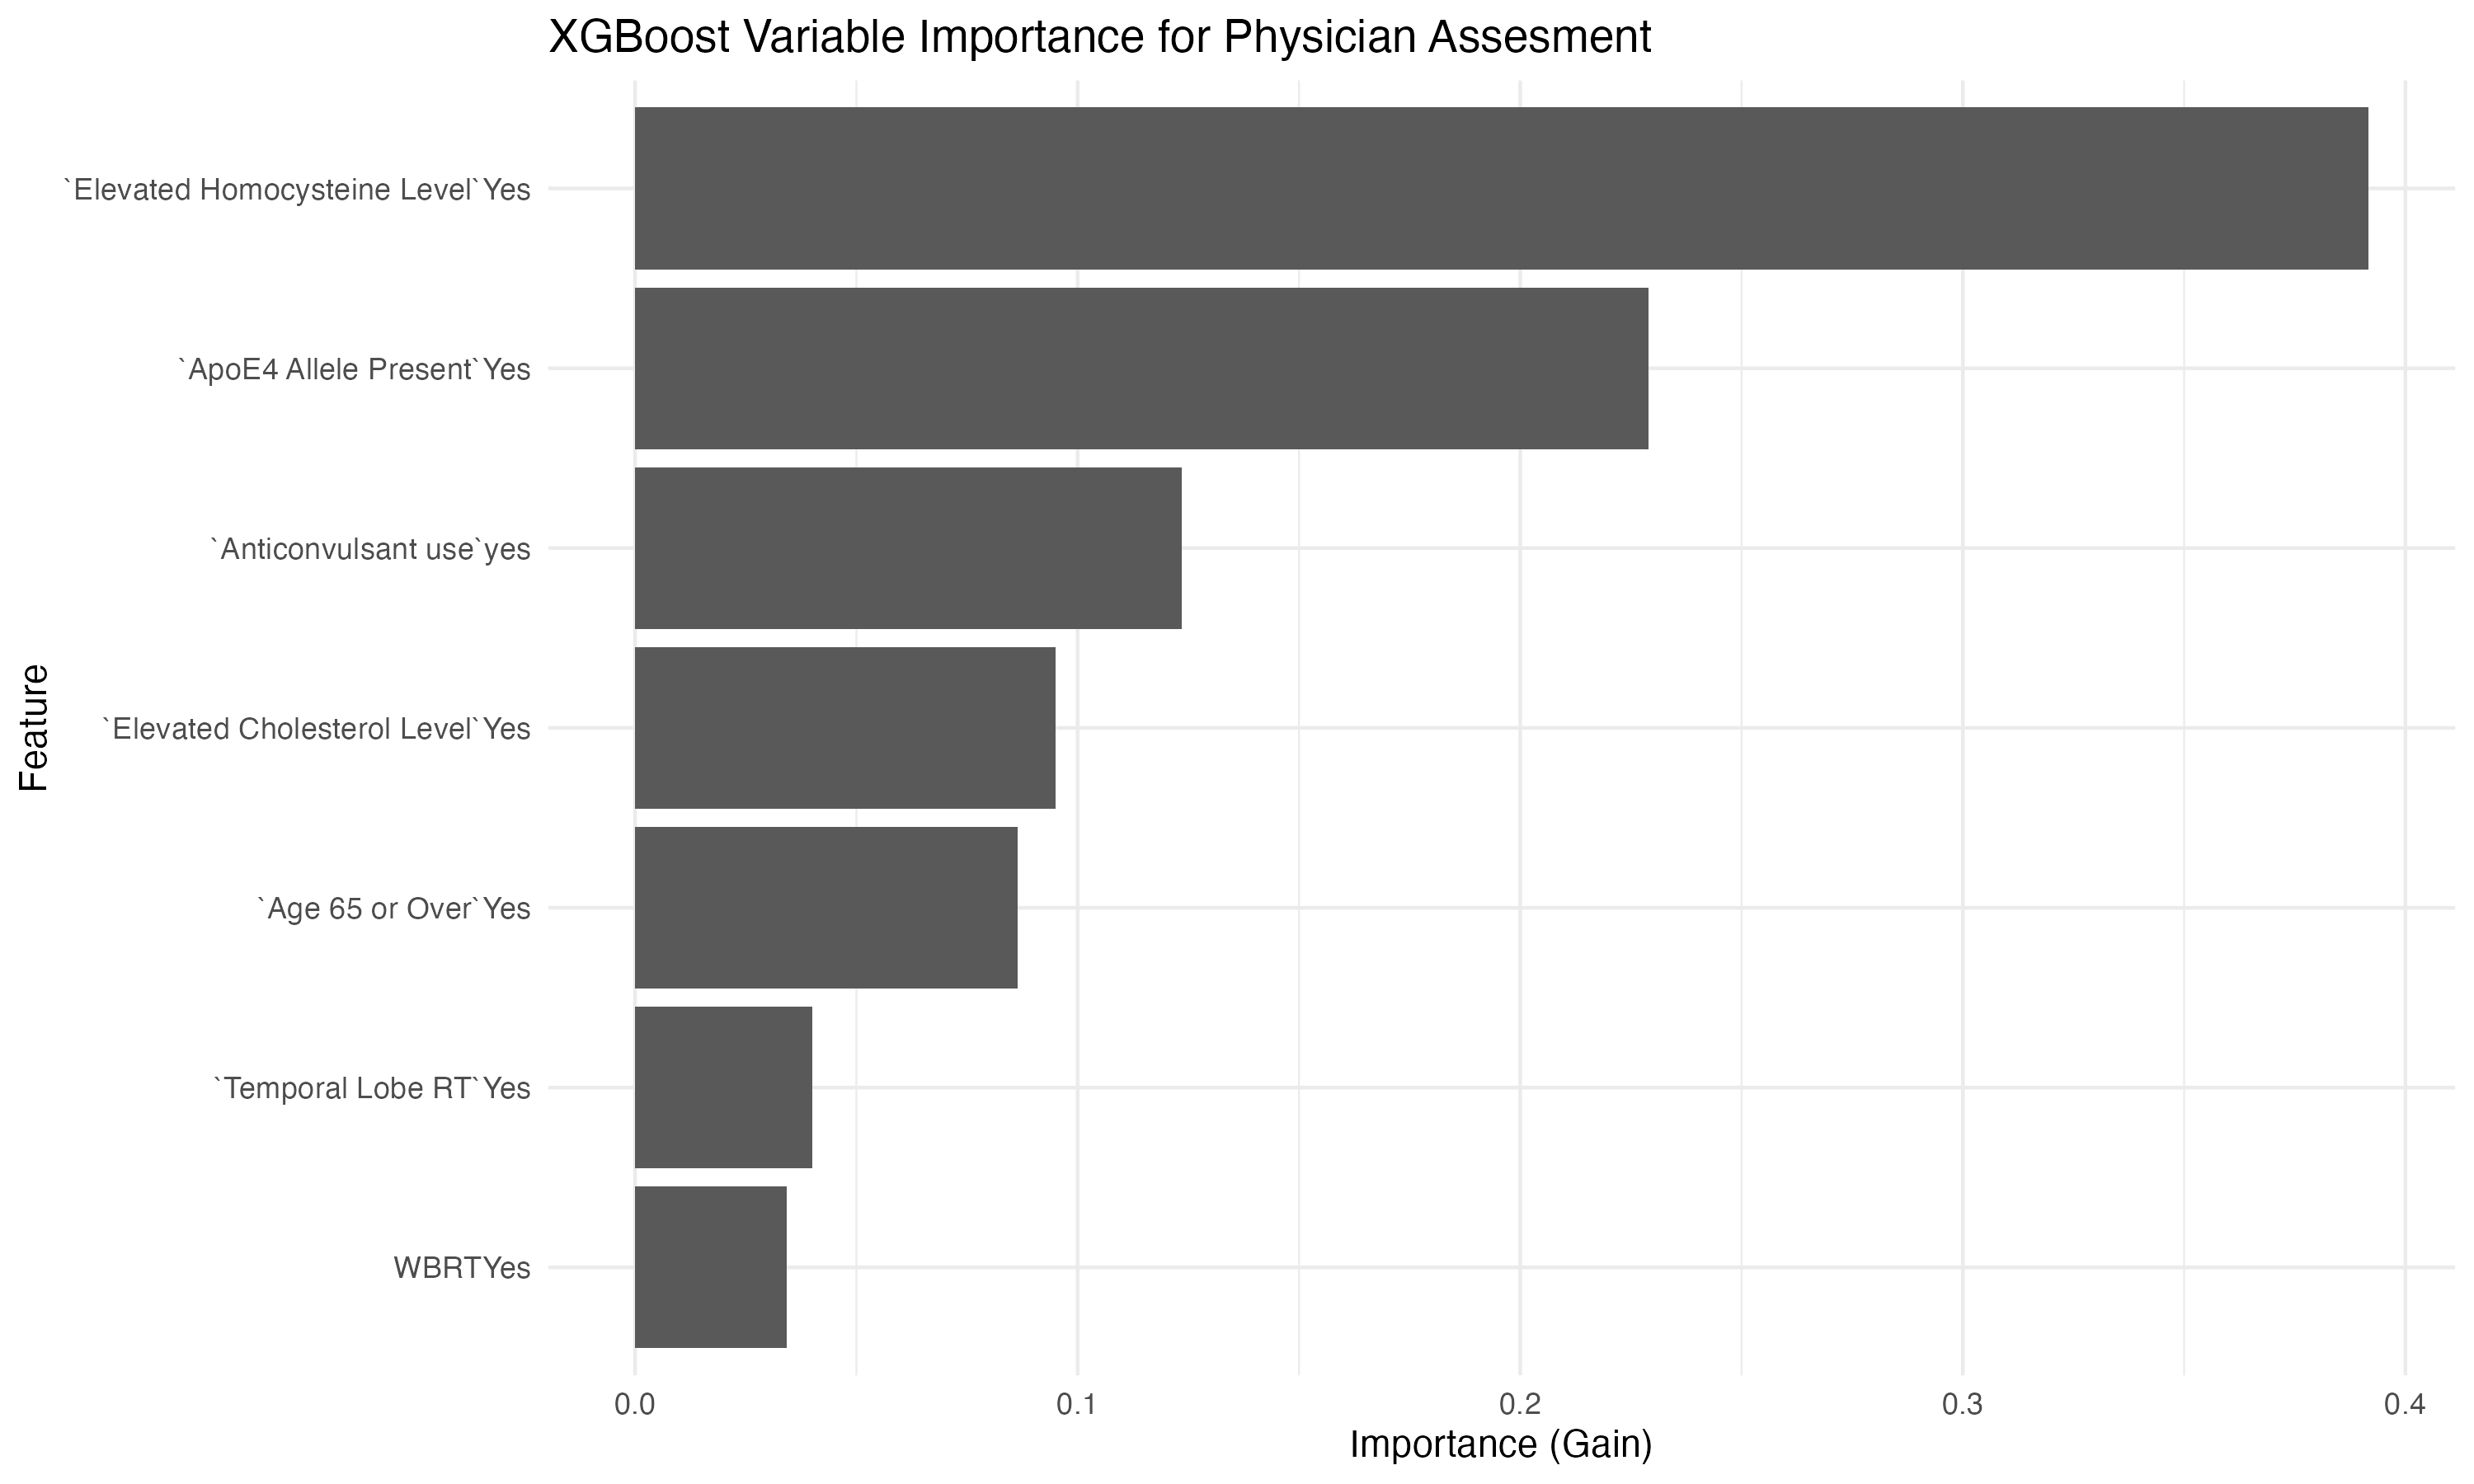

Supplement: Supplementary file 1 [file b4053056d186f721fe820a01.docx]
